# Supplementary material
Source: publisher site journal article supplement (https://www.dovepress.com/article/453250)
Supplement: Supplementary file 1 [file get_supplementary_file.php]

**Manuscript title:** Hepatic arterial infusion chemotherapy vs. transcatheter arterial chemoembolization as adjuvant therapy following surgery for MVI-positive hepatocellular carcinoma: a multicenter propensity score matching analysis

**List of authors:** Yuhua Wen, Lianghe Lu, Jie Mei, Yihong Ling, Renguo Guan, Wenping Lin, Wei Wei, Rongping Guo

Supplementary Table 1. The baseline characteristics of HCC patients with MVI among different adjuvant treatment groups before and after PSM.

| Variable | Before PSM | | | After PSM | | |
| --- | --- | --- | --- | --- | --- | --- |
|  | HAIC | TACE | *P* | HAIC | TACE | *P* |
| n | 157 | 116 |  | 92 | 92 |  |
| Gender (%) |  |  | 0.068 |  |  | 0.309 |
| Male | 136 (86.6) | 109 (94.0) |  | 81 (88.0) | 86 (93.5) |  |
| Female | 21 (13.4) | 7 (6.0) |  | 11 (12.0) | 6 (6.5) |  |
| Age (%) |  |  | **<0.001** |  |  | 0.052 |
| ≤65 | 141 (89.8) | 112 (96.6) |  | 81 (88.0) | 89 (96.7) |  |
| ＞65 | 16 (10.2) | 4 (3.4) |  | 11 (12.0) | 3 (3.3) |  |
| HBsAg (%) |  |  | 1.000 |  |  | 0.496 |
| Negative | 20 (12.7) | 14 (12.1) |  | 13 (14.1) | 9 (9.8) |  |
| Positive | 137 (87.3) | 102 (87.9) |  | 79 (85.9) | 83 (90.2) |  |
| ALT (%) |  |  | 0.062 |  |  | 1.000 |
| ≤40 | 101 (64.3) | 61 (52.6) |  | 54 (58.7) | 54 (58.7) |  |
| ＞40 | 56 (35.7) | 55 (47.4) |  | 38 (41.3) | 38 (41.3) |  |
| Tbil (%) |  |  | 0.554 |  |  | 0.644 |
| ≤20.5 | 142 (90.4) | 102 (87.9) |  | 83 (90.2) | 80 (87.0) |  |
| ＞20.5 | 15 (9.6) | 14 (12.1) |  | 9 (9.8) | 12 (13.0) |  |
| ALBI (%) |  |  | **0.044** |  |  | 0.062 |
| I | 127 (80.9) | 81 (69.8) |  | 75 (81.5) | 62 (67.4) |  |
| II | 30 (19.1) | 35 (30.2) |  | 17 (18.5) | 30 (32.6) |  |
| AFP (%) |  |  | 0.272 |  |  | 0.075 |
| ≤400 | 88 (56.1) | 57 (49.1) |  | 57 (62.0) | 44 (47.8) |  |
| ＞400 | 69 (43.9) | 59 (50.9) |  | 35 (38.0) | 48 (52.2) |  |
| Number (%) |  |  | **0.007** |  |  | 1.000 |
| Solitary | 114 (72.6) | 100 (86.2) |  | 80 (87.0) | 80 (87.0) |  |
| Multiple | 43 (27.4) | 16 (13.8) |  | 12 (13.0) | 12 (13.0) |  |
| Tumor diameter (cm) |  |  | **0.012** |  |  | 1.000 |
| ＜10 | 132 (84.1) | 83 (71.6) |  | 66 (71.7) | 65 (70.7) |  |
| ≥10 | 25 (15.9) | 33 (28.4) |  | 26 (28.3) | 27 (29.3) |  |
| Cirrhosis (%) |  |  | **0.049** |  |  | 0.103 |
| Absent | 78 (49.7) | 72 (62.1) |  | 44 (47.8) | 56 (60.9) |  |
| Present | 79 (50.3) | 44 (37.9) |  | 48 (52.2) | 36 (39.1) |  |
| Resection margin (cm) |  |  | **<0.001** |  |  | 1.000 |
| ＜1 | 25 (15.9) | 49 (42.2) |  | 25 (27.2) | 25 (27.2) |  |
| ≥1 | 132 (84.1) | 67 (57.8) |  | 67 (72.8) | 67 (72.8) |  |
| Child-Pugh grade |  |  | 0.510 |  |  | NA |
| A | 155 (98.7) | 116 (100.0) |  | 91 (98.9) | 92 (100.0) |  |
| B | 2 (1.3) | 0 (0.0) |  | 1 (1.1) | 0 (0.0) |  |

Bold values indicate statistical significance (P < 0.05). HCC, hepatocellular carcinoma; PSM, propensity score matching; a-HAIC, adjuvant hepatic artery infusion chemotherapy; a-TACE, adjuvant transcatheter arterial chemoembolization; HBsAg, hepatitis B surface antigen; ALT, alanine aminotransferase; TBIL, total serum bilirubin; ALBI, Albumin-Bilirubin; AFP, alpha-fetoprotein.

Supplement Table 2. Univariate and multivariate analysis for DFS and OS in HCC patients with MVI in adjuvant treatment and control group before PSM.

|  |  | DFS | | | | |  | OS | | | | |  |
| --- | --- | --- | --- | --- | --- | --- | --- | --- | --- | --- | --- | --- | --- |
| Cohort | Variables | Univariate | |  | Multivariate | |  | Univariate | |  | Multivariate | |  |
|  |  | HR | 95%CI | *P* | HR | 95%CI | *P* | HR | 95%CI | *P* | HR | 95%CI | *P* |
| After PSM (n=549) | Gender (Male/  Female) | 0.776 | 0.530-1.135 | 0.191 |  |  |  | 1.143 | 0.718-1.820 | 0.573 |  |  |  |
|  | Age (>/≤ 65 years) | 0.998 | 0.989-1.007 | 0.657 |  |  |  | 0.824 | 0.597-1.139 | 0.242 |  |  |  |
|  | HBsAg (Absent/  Present) | 1.256 | 0.899-1.753 | 0.182 |  |  |  | 1.070 | 0.690-1.658 | 0.762 |  |  |  |
|  | Tumor diameter (＜/≥10cm) | 1.527 | 1.188-1.962 | **<0.001** | 1.347 | 1.039-1.748 | **0.025** | 2.196 | 1.594-3.025 | **0.000** | 1.795 | 1.289-2.498 | **0.001** |
|  | Number (single/multiple) | 1.215 | 0.937-1.575 | 0.141 |  |  |  | 1.161 | 0.809-1.668 | 0.418 |  |  |  |
|  | Resection margin (>/≤ 1cm) | 1.235 | 0.994-1.532 | 0.056 |  |  |  | 0.746 | 0.549-1.013 | 0.061 |  |  |  |
|  | ALBI (grade I/II) | 1.517 | 1.185-1.941 | **<0.001** | 1.504 | 1.164-1.945 | **0.002** | 1.866 | 1.345-2.587 | **0.000** | 1.5542 | 1.096-2.170 | **0.013** |
|  | AFP (>/≤400 ng/ml) | 1.273 | 1.027-1.578 | **0.027** | 1.331 | 1.073-1.651 | **0.009** | 1.179 | 0.879-1.582 | 0.271 |  |  |  |
|  | Cirrhosis (Absent/Present) | 1.164 | 0.939-1.442 | 0.165 |  |  |  | 1.130 | 0.843-1.515 | 0.414 |  |  |  |
|  | Type of treatment |  |  |  |  |  |  |  |  |  |  |  |  |
|  | Control |  |  |  |  |  |  |  |  |  |  |  |  |
|  | a-TACE | 0.717 | 0.553-0.929 | **0.012** | 0.635 | 0.487-0.828 | **0.001** | 1.232 | 0.895-1.695 | 0.200 | 1.045 | 0.751-1.453 | 0.795 |
|  | a-HAIC | 0.461 | 0.348-0.609 | **0.000** | 0.470 | 0.356-0.622 | **0.000** | 0.313 | 0.191-0.512 | **0.000** | 0.325 | 0.198-0.531 | **0.000** |

Bold values indicate statistical significance (P < 0.05). HCC, hepatocellular carcinoma; PSM, propensity score matching; a-HAIC, adjuvant hepatic artery infusion chemotherapy; a-TACE, adjuvant transcatheter arterial chemoembolization; HBsAg, hepatitis B surface antigen; ALBI, Albumin-Bilirubin; AFP, alpha-fetoprotein; DFS, disease-free survival; OS, overall survival.

Figure S1. The Kaplan-Meier survival analysis for subgroups of HCC patients with different tumor diameters.


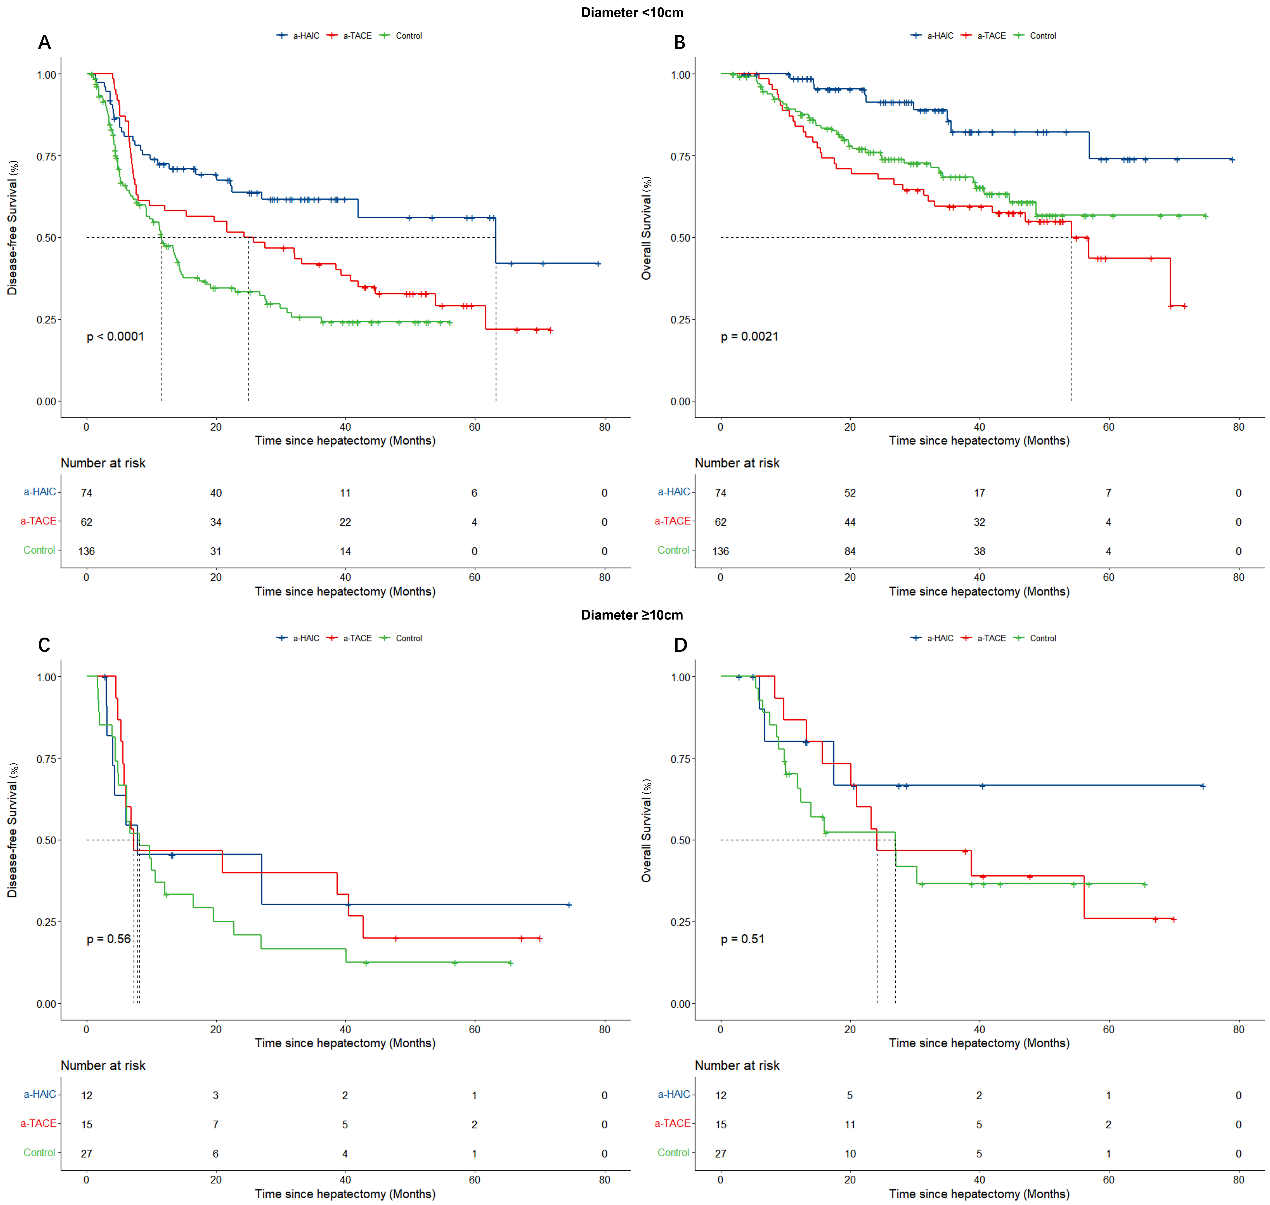


Supplementary Figure 1. The Kaplan-Meier survival analysis for subgroups of HCC patients with different tumor diameters. The analysis of DFS and OS among HCC patients with different tumor diameters. In the tumor diameter <10cm group, Kaplan-Meier curves of DFS (A) and OS (B) between a-HAIC, a-TACE and control group. In the tumor diameter ≥10cm group, Kaplan-Meier curves of DFS (C) and OS (D) between a-HAIC, a-TACE and control group. DFS, disease-free survival; OS, overall survival; HCC, hepatocellular carcinoma; a-HAIC, adjuvant hepatic artery infusion chemotherapy; a-TACE, adjuvant transcatheter arterial chemoembolization.
